# Supplementary material
Source: Royal Society of Chemistry journal article supplement (doi:10.1039/d6ta00735j)
Supplement: d6ta00735j1.pdf [file d6ta00735j1.pdf]

## Supplementary Information for

# **Synergistic Passivation of Perovskite Surfaces Using a Multi-Functional Four-End Zwitterionic Amino Acid**

Yan Chen,<sup>ab</sup> Xun-lei Ding,<sup>\*ab</sup> Yan Yan,<sup>ac</sup> Ya-qian Ma,<sup>a</sup> Ang-ran Wen,<sup>a</sup> Jiao-jiao Chen<sup>a</sup>  
and Wei Li<sup>a</sup>

<sup>a</sup> Institute of Clusters and Low Dimensional Nanomaterials, School of Mathematics and Physics, North China Electric Power University, Beinong Road 2, Changping, Beijing 102206, P. R. China.

<sup>b</sup> Hebei Key Laboratory of Physics and Energy Technology, North China Electric Power University, Baoding, 071000, China.

<sup>c</sup> School of New Energy, North China Electric Power University, Beinong Road 2, Changping, Beijing 102206, P. R. China

\* Author to whom correspondence should be addressed.

Email: dingxl@ncepu.edu.cn

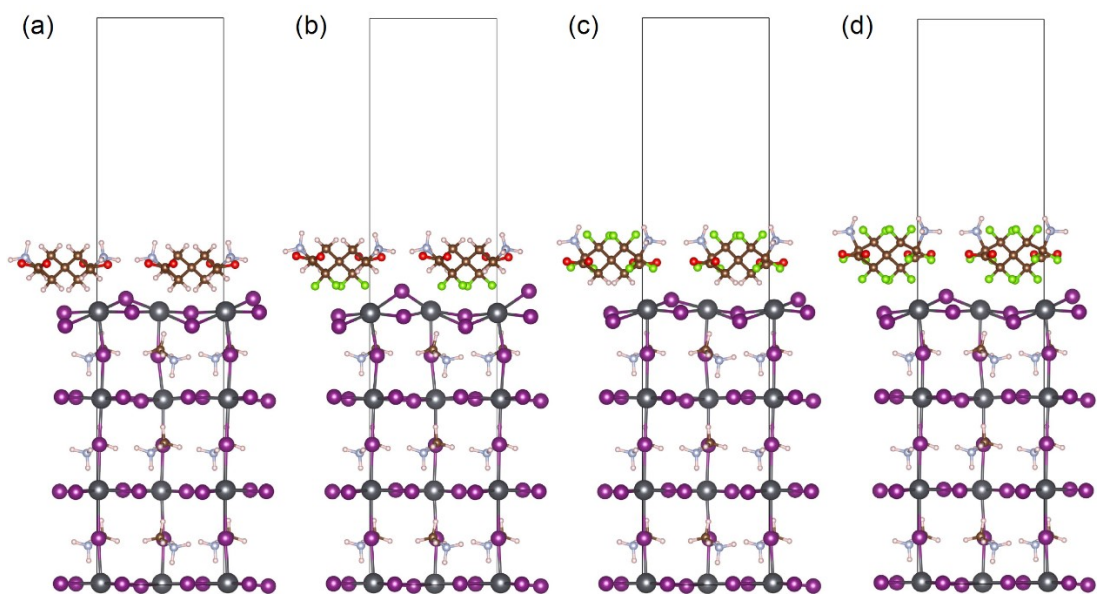

Figure S1 The structures (a) ZAA<sub>allH</sub>-PS-mode2, (b) ZAA<sub>CF</sub>-PS-mode2, (c) ZAA<sub>NF</sub>-PS-mode2, and (d) ZAA<sub>allF</sub>-PS-mode2.

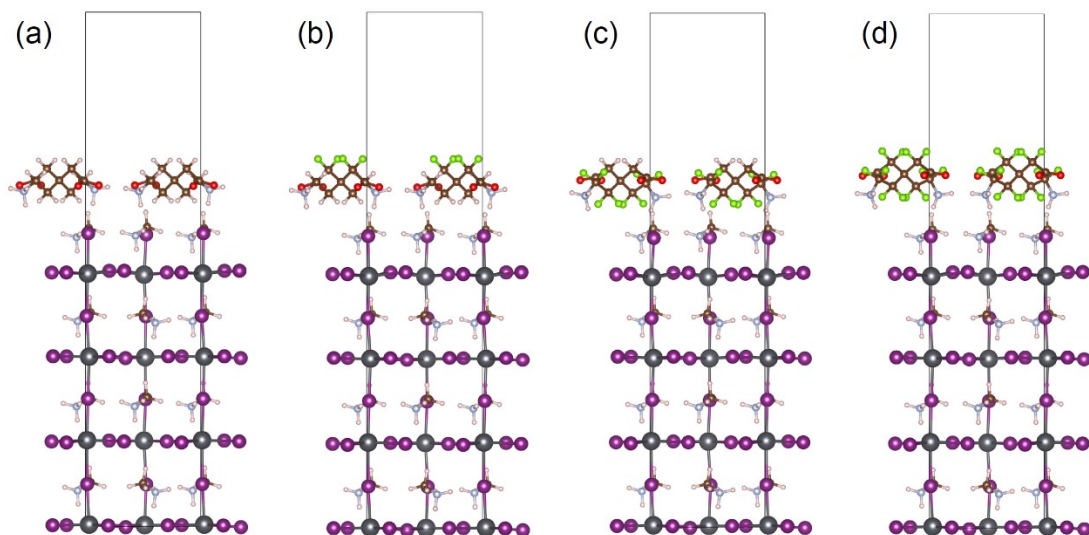

Figure S2 The optimized structures of (a) ZAA<sub>allH</sub>, (b) ZAA<sub>CF</sub>, (c) ZAA<sub>NF</sub>, and (d) ZAA<sub>allF</sub> on the perovskite with MAI-terminated surface.

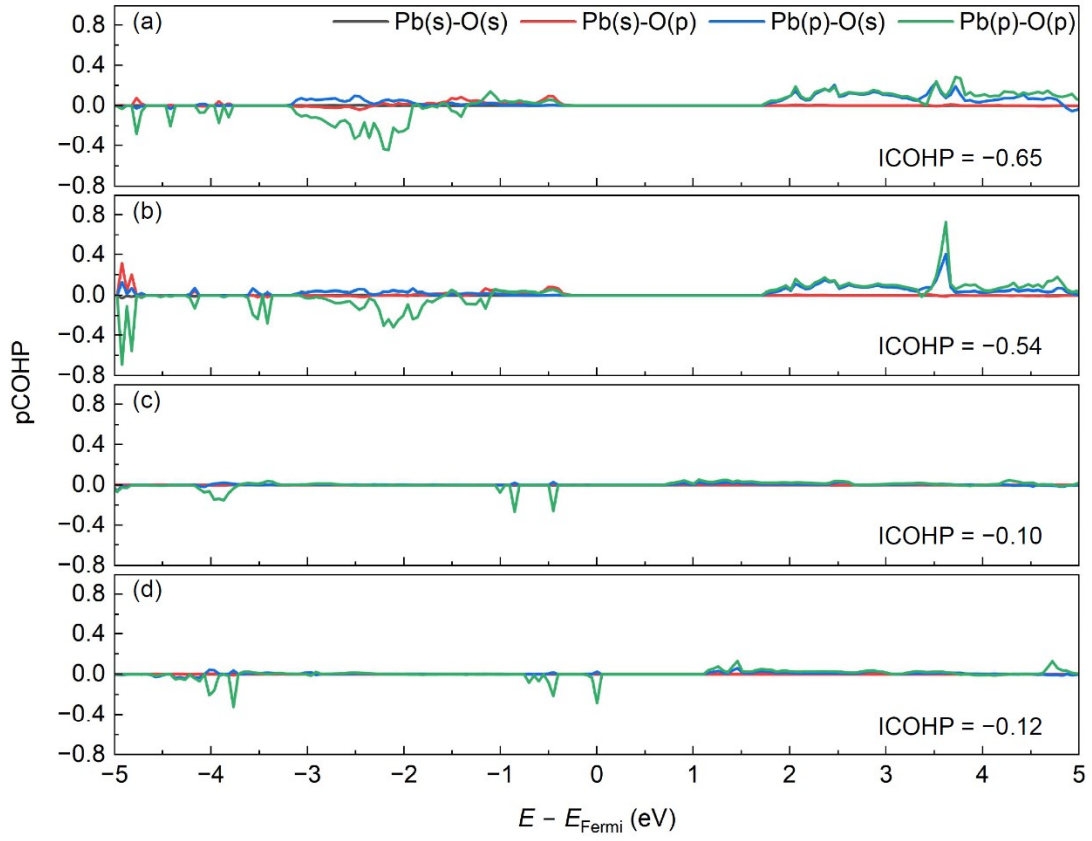

Figure S3 The average pCOHP between O and Pb in (a)  $ZAA_{\text{allH}}\text{-PS}$ , (b)  $ZAA_{\text{CF}}\text{-PS}$ , (c)  $ZAA_{\text{NF}}\text{-PS}$ , and (d)  $ZAA_{\text{allF}}\text{-PS}$ . The ICOHP is labeled at the bottom right corner.

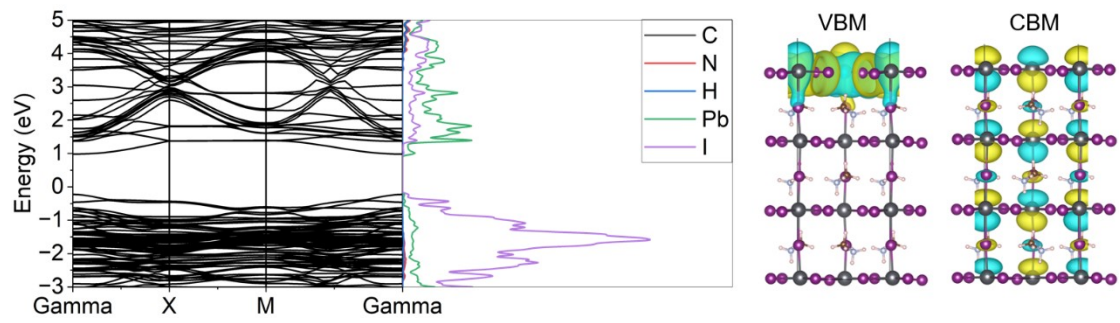

Figure S4 The band structure and projected density of states (PDOS), and the real-space distribution of the wave function of VBM and CBM with an isosurface value of  $2 \times 10^{-8}$  e/bohr<sup>3</sup> of the PS.

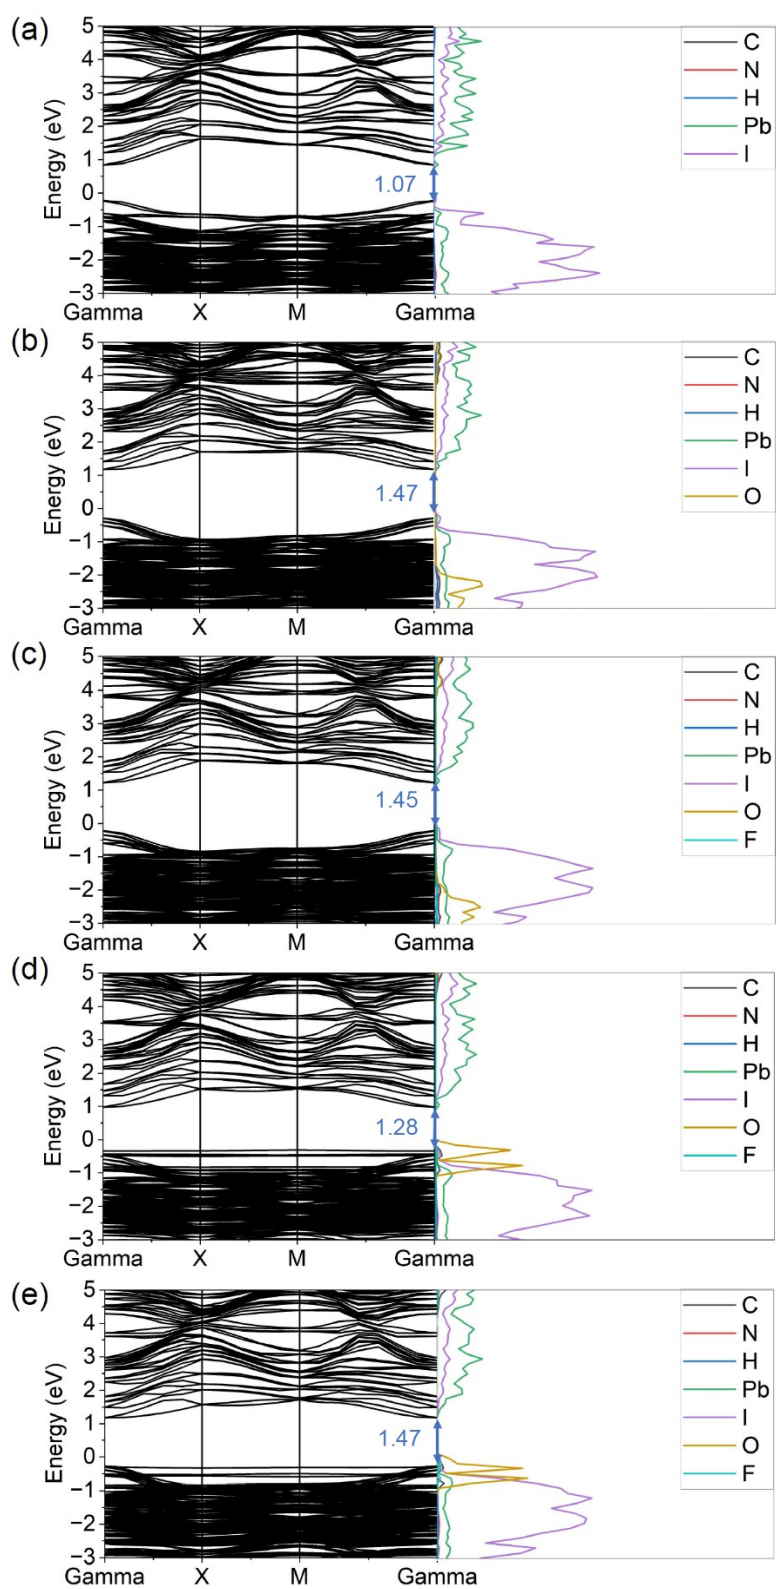

Figure S5 The band structure and projected density of states (PDOS) calculated by HSE+SOC of (a) PS, (b) ZAA<sub>allH</sub>-PS, (c) ZAA<sub>CF</sub>-PS, (d) ZAA<sub>NF</sub>-PS, and (e) ZAA<sub>allF</sub>-PS, respectively.

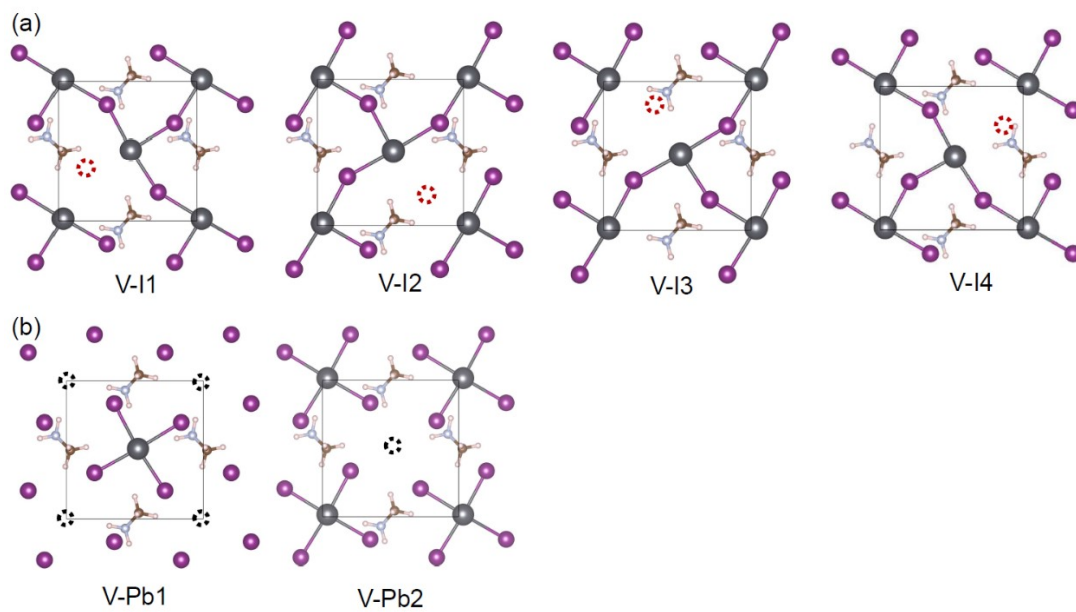

Figure S6 The locations of the various defect sites of (a) the I vacancy indicated by a red dashed line, and (b) the Pb vacancy indicated by a black dashed line.

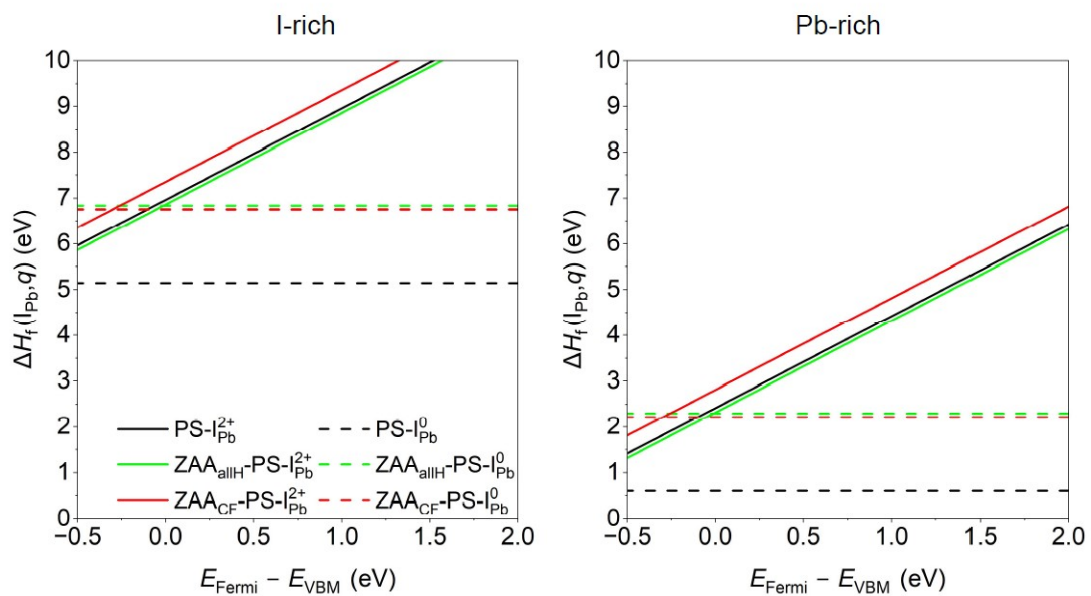

Figure S7 The formation energies of Pb interstitial defects ( $\Delta H_f(I_{Pb}, q)$ ) in PS,  $ZAA_{allH}$ -PS, and  $ZAA_{CF}$ -PS at I-rich (left) and Pb-rich (right) chemical potentials.

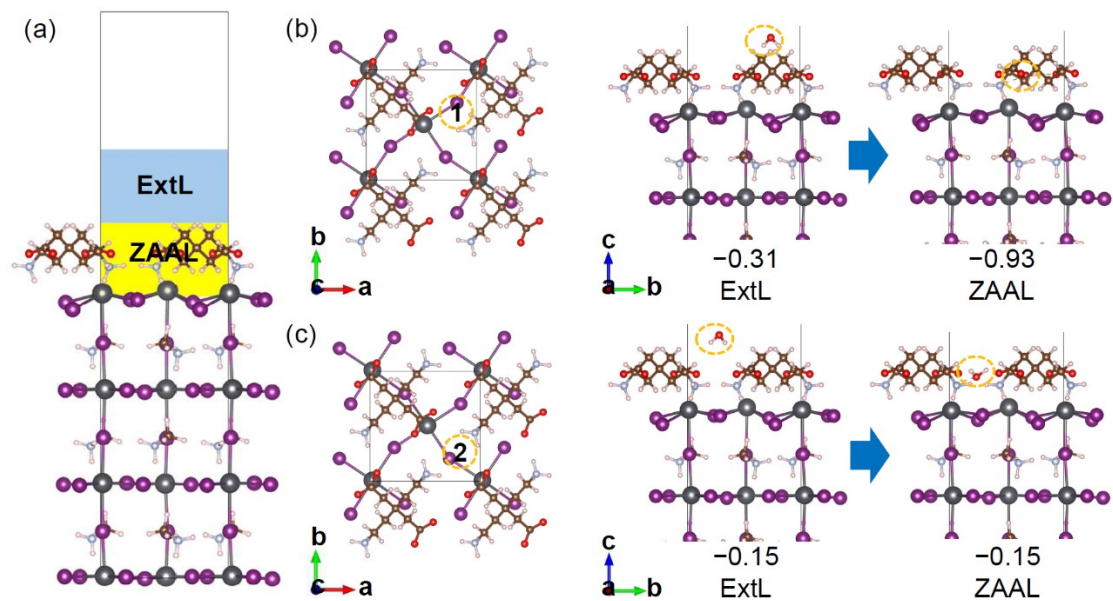

Figure S8 (a) Two zones in the shallow surface of ZAA<sub>allH</sub>-PS for H<sub>2</sub>O invasion, labelled as ExtL and ZAAL from outside to inside the surface. The invasion process of H<sub>2</sub>O from (b) site 1 and (c) site 2, with the relative energy ( $E_{r-H_2O}$ ) in eV. The H<sub>2</sub>O is indicated by an orange dashed line.

Table S1 The Pb...O distances between oxygen atoms in ZAA and Pb atoms on the surface of the perovskite ( $d_1'$ - $d_4'$ , Å), average Pb...O distance ( $\bar{d}'$ , Å). Binding energy between ZAA and perovskite of mode2 ( $E_b'$ , eV). Binding energy difference between  $E_b'$  and  $E_b$  (eV).

|                               | $d_1'$ | $d_2'$ | $d_3'$ | $d_4'$ | $\bar{d}'$ | $E_b'$ | $E_b' - E_b$ |
|-------------------------------|--------|--------|--------|--------|------------|--------|--------------|
| ZAA <sub>allH</sub> -PS-mode2 | 3.33   | 3.46   | 3.46   | 3.51   | 3.44       | 2.99   | -2.05        |
| ZAA <sub>CF</sub> -PS-mode2   | 3.86   | 3.92   | 3.97   | 3.98   | 3.93       | 2.15   | -2.4         |
| ZAA <sub>NF</sub> -PS-mode2   | 3.29   | 3.37   | 3.47   | 3.52   | 3.41       | 2.87   | -1.19        |
| ZAA <sub>allF</sub> -PS-mode2 | 3.95   | 3.96   | 4.00   | 4.06   | 3.99       | 1.40   | -1.87        |

Table S2 Binding energy between ZAA and perovskite with PbI-terminated surface ( $E_b$ , eV), and binding energy between ZAA and perovskite with MAI-terminated surface ( $E_b$ -other, eV)

|                         | $E_b$ | $E_b$ -other |
|-------------------------|-------|--------------|
| ZAA <sub>allH</sub> -PS | 5.04  | 3.69         |
| ZAA <sub>CF</sub> -PS   | 4.55  | 2.86         |
| ZAA <sub>NF</sub> -PS   | 4.06  | 2.87         |
| ZAA <sub>allF</sub> -PS | 3.27  | 1.94         |

Table S3 The band gaps (eV) of PS, ZAA<sub>allH</sub>-PS, ZAA<sub>CF</sub>-PS, ZAA<sub>NF</sub>-PS, and ZAA<sub>allF</sub>-PS calculated by different methods.

|                         | PBE  | PBE+SOC | HSE+SOC |
|-------------------------|------|---------|---------|
| PS                      | 1.21 | 0.40    | 1.07    |
| ZAA <sub>allH</sub> -PS | 1.71 | 0.90    | 1.47    |
| ZAA <sub>CF</sub> -PS   | 1.70 | 0.91    | 1.45    |
| ZAA <sub>NF</sub> -PS   | 0.78 | 0.28    | 1.28    |
| ZAA <sub>allF</sub> -PS | 1.10 | 0.56    | 1.47    |

## Defect formation energy calculations

The defect formation energy  $\Delta H_f(\alpha, q)$  is a function of both the electron Fermi energy  $E_F$  and the chemical potentials of the species involved in the defects. It could be calculated as:

$$\Delta H_f(\alpha, q) = E(\alpha, q) - E(\text{perfect}) + \Delta n_{\text{Pb}}(E_{\text{Pb}} + \mu_{\text{Pb}}) + \Delta n_{\text{I}}\left(\frac{1}{2}E_{\text{I}} + \mu_{\text{I}}\right) + q(E_F + E_{\text{VBM}}) \quad (\text{S-1})$$

where  $E(\alpha, q)$  indicates the total energy calculated from the supercell with defect  $\alpha$  in the charge state  $q$  and  $E(\text{perfect})$  is the total energy of the supercell without any defects.  $\Delta n$  is the number of atoms added ( $\Delta n < 0$ ) or removed ( $\Delta n > 0$ ) from the supercell.  $\mu_{\text{I}}$ ,  $\mu_{\text{Pb}}$ , and  $\mu_{\text{MA}}$  are the chemical potential of I, Pb, and MA, respectively. The chemical potential values can be determined from the phase diagram of the MAPbI<sub>3</sub> perovskite. To obtain the phase diagram for MAPbI<sub>3</sub>, the following chemical equations are considered.

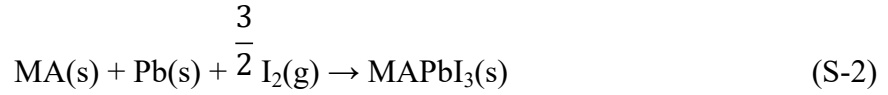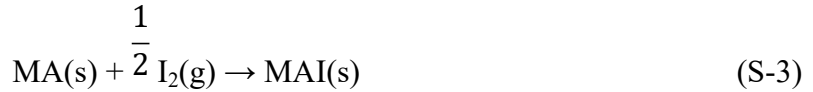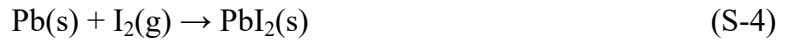

The  $\Delta H_1$ ,  $\Delta H_2$ , and  $\Delta H_3$  are defined as the change in enthalpy corresponding to the reactions. The total energy of each chemical species, as summarized in Table S4. Hence,  $\Delta H_1 = -8.69$  eV,  $\Delta H_2 = -5.77$  eV, and  $\Delta H_3 = -4.54$  eV. Assuming equilibrium among MAI, PbI<sub>2</sub>, and MAPbI<sub>3</sub>,  $\mu_{\text{I}}$ ,  $\mu_{\text{Pb}}$ , and  $\mu_{\text{MA}}$  must satisfy

$$\mu_{\text{MA}} + \mu_{\text{Pb}} + 3\mu_{\text{I}} = \Delta H_1 \quad (\text{S-5})$$

$$\mu_{\text{MA}} + \mu_{\text{I}} < \Delta H_2 \quad (\text{S-6})$$

$$\mu_{\text{Pb}} + 2\mu_{\text{I}} < \Delta H_3 \quad (\text{S-7})$$

$$\mu_{\text{MA}}, \mu_{\text{Pb}}, \mu_{\text{I}} < 0 \quad (\text{S-8})$$

As the I-rich condition,  $\mu_{\text{I}} = 0$  eV,  $\mu_{\text{Pb}} = -4.54$  eV, and  $\mu_{\text{MA}} = -4.42$  eV. As the Pb-rich condition,  $\mu_{\text{I}} = -2.27$  eV,  $\mu_{\text{Pb}} = 0$  eV, and  $\mu_{\text{MA}} = -1.88$  eV.

Table S4 Total energy (eV) of the chemical species.

| Species                | Total energy (eV) |
|------------------------|-------------------|
| I <sub>2</sub> (g)     | -2.71             |
| Pb(s)                  | -3.57             |
| MA(s)                  | -35.84            |
| MAI(s)                 | -42.96            |
| PbI <sub>2</sub> (s)   | -9.46             |
| MAPBI <sub>3</sub> (s) | -52.34            |

## Simulation of Power conversion efficiency (PCE)

To get the parameters of the ZAA<sub>CF</sub>-PS, we took them as 2D materials and did the following calculations. The effective conduction band density ( $N_c$ ) and effective valence band density ( $N_v$ ) are defined as

$$N_c = \frac{2(2\pi m_n^* k_0 T)^{3/2}}{h^3} \quad (\text{S-9})$$

$$N_v = \frac{2(2\pi m_p^* k_0 T)^{3/2}}{h^3} \quad (\text{S-10})$$

where  $h$  is Planck's constant,  $T$  is the temperature,  $m_n^*$  and  $m_p^*$  are the effective masses of electrons and holes

$$m_{n/p}^* = \frac{h}{2\pi} \left[ \frac{\partial^2 E_{VBM/CBM}}{\partial k^2} \right] \quad (\text{S-11})$$

where  $E$  is the total energy of the system.

According to the deformation potential theory,<sup>1</sup> the carrier mobility ( $\mu$ ) of 2D materials can be calculated according to the equation<sup>2</sup>

$$\mu = \frac{2eh^3 C}{3(2\pi)^3 k_B T (m^*)^2 (E_1)^2} \quad (\text{S-12})$$

where  $e$  is the electron charge,  $C$  is the elastic constant, and  $E_1$  is deformation potential constant. The  $C$  and  $E_1$  can be obtained by

$$C = \left[ \frac{\partial^2 E}{\partial \left(\frac{\Delta a}{a_0}\right)^2} \right] / S_0 \quad (\text{S-13})$$

$$E_1 = \frac{\partial E_{edge}}{\partial \left(\frac{\Delta a}{a_0}\right)} \quad (\text{S-14})$$

where  $E_{edge}$  is the energy of the band edge,  $\Delta a$  is the change of lattice parameter relative to the equilibrium lattice parameter, and  $S_0$  is the area of the unit cell at equilibrium.

#### References for the ESI

- 1 J. Bardeen and W. Shockley, Phys. Rev., 1950, 80, 72.
- 2 N. Wang, M. Li, H. Xiao, H. Gong, Z. Liu, X. Zu and L. Qiao, Phys. Chem. Chem. Phys., 2019, 21, 15097.
